# Supplementary material for: A simple colorimetric and ratiometric fluoride ion probe with large color change
Source: Royal Society of Chemistry journal article supplement (doi:10.1039/d0ra06782b), 2020-12-21
Supplement: d0ra06782b1.pdf [file d0ra06782b1.pdf]

## Supporting Information

### **A simple colorimetric and ratiometric fluoride ion probe with large color change**

Heng Shi, Hongjin Chen, Xiangguo Li, Jieni Xing, Gang Zhang, Rui Zhang, Jian Liu\*

*Jiangsu Co-Innovation Center of Efficient Processing and Utilization of Forest Resources, Jiangsu Key Lab of Biomass-based Green Fuels and Chemicals, College of Chemical Engineering, Nanjing Forestry University, Nanjing 210037, China.*

\*Corresponding author: Prof. Jian Liu, [liu.jian@njfu.edu.cn](mailto:liu.jian@njfu.edu.cn)

## Table of contents

*General.*

**Fig. S1**  $^1\text{H}$  NMR spectra of compound **3** in  $\text{CDCl}_3-d$ .

**Fig. S2**  $^{13}\text{C}$  NMR spectra of compound **3** in  $\text{CDCl}_3-d$ .

**Fig. S3**  $^1\text{H}$  NMR spectra of compound **4** in  $\text{CDCl}_3-d$ .

**Fig. S4**  $^{13}\text{C}$  NMR spectra of compound **4** in  $\text{CDCl}_3-d$ .

**Fig. S5**  $^1\text{H}$  NMR spectra of probe **SHJ-1** in  $\text{DMSO}-d_6$ .

**Fig. S6**  $^{13}\text{C}$  NMR spectra of probe **SHJ-1** in  $\text{DMSO}-d_6$ .

**Fig. S7** FT-IR spectrum of probe **SHJ-1**.

**Fig. S8**  $^1\text{H}$  NMR spectra of probe **SHJ-2** in  $\text{DMSO}-d_6$ .

**Fig. S9**  $^{13}\text{C}$  NMR spectra of probe **SHJ-2** in  $\text{DMSO}-d_6$ .

**Fig. S10** FT-IR spectrum of probe **SHJ-2**.

**Fig. S11** The stability of a) **SHJ-1** and b) **SHJ-2** in DMSO.

**Fig. S12** The response time of a) **SHJ-1** and b) **SHJ-2** to  $\text{F}^-$  in DMSO solution.

**Fig.S13** a) Absorption spectra of probe **SHJ-2** in DMSO with the addition of different equiv. of TBAF; b) The absorbance ratio ( $A_{302\text{nm}}/A_{380\text{nm}}$ ) of **SHJ-2** versus  $\text{F}^-$  concentrations.

**Fig. S14** a) Job's plot for complexation of **SHJ-2** with  $\text{F}^-$  anion. b) Benesi - Hildebrand plot of **SHJ-2** by UV-vis measurements. c) Absorbance of **SHJ-2** in the presence of TBAF at different concentration in DMSO.

**Fig. S15** Absorbance spectra of **SHJ-2** in the presence of 23.33 equivalents of TBAF in DMSO with various content of water.

**Fig. S16** The intensity of the maximum visible absorption peak of probes **SHJ-1** with the addition of 8 equiv. of various anions (as tetrabutylammonium salt) in a) DMF and b) DCM solution at room temperature. (Inset: Color changes of **SHJ-1** with the addition of 8 equiv. of various anions under ambient light). Absorption spectra of probe **SHJ-1** in c) DMF and d) DCM with the addition of different equiv. of TBAF;

**Fig. S17**  $^1\text{H}$  NMR titration spectra of the probe **SHJ-2** in  $\text{DMSO-}d_6$  in presence of different equivalents of TBAF.

**Fig. S18** The intensity of the maximum visible absorption peak of probes **SHJ-1** with the addition of 8 equiv. of various anions (as tetrabutylammonium salt) in a) DMF and b) DCM solution at room temperature.

**Fig. S19** a)  $^1\text{H}$  NMR titration spectra of the probe **SHJ-2** in  $\text{DMSO-}d_6$  in presence of different equivalents of TBAF; b) Optimized structures of **SHJ-2** and **SHJ-2** +  $\text{F}^-$ .

**Fig. S20** A schematic of probable complex formation reaction during the fluoride sensing process.

**Table S1** Properties of **SHJ-1** and the reported acylhydrazone-based fluoride ion probes.

## General

All chemicals and reagents were used as received from chemical companies without further purification unless otherwise stated. Column chromatography was performed using silica gel as a stationary phase. Geometry optimization of the pristine probes and binding with  $F^-$  were performed using B3LYP functional and 6-31G (d,p) basis set implemented in the Gaussian 16 program package.<sup>1</sup>

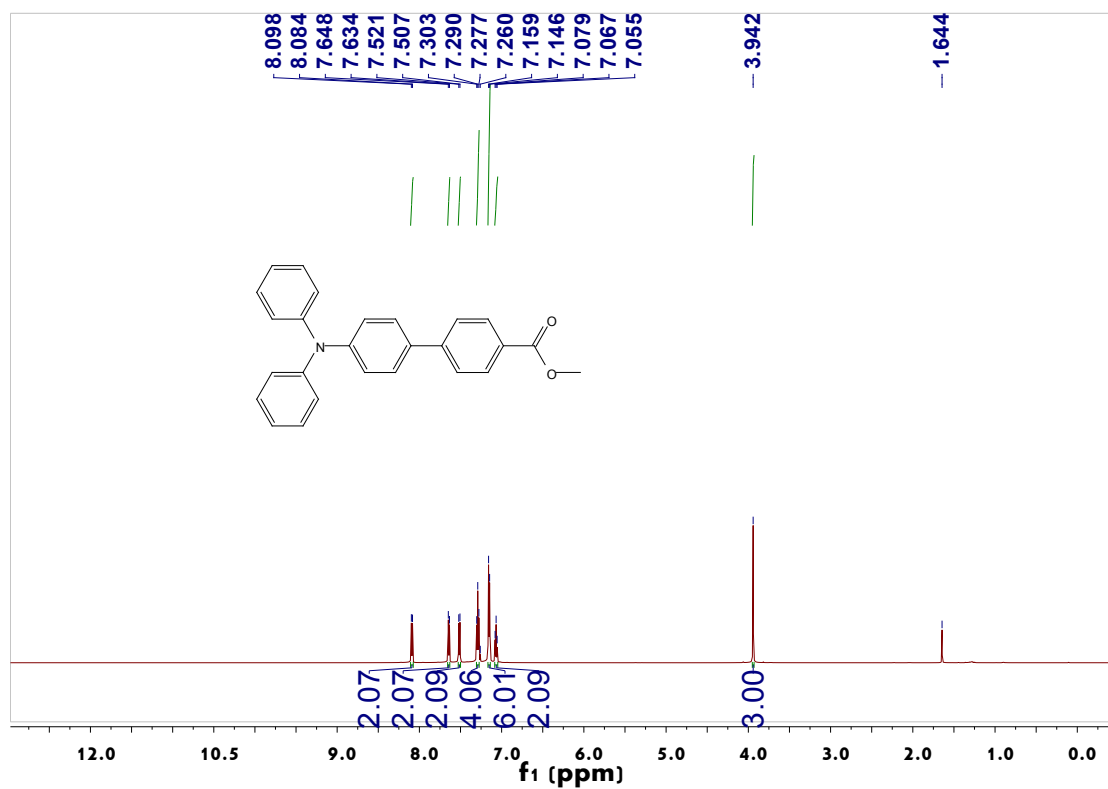

**Fig. S1** <sup>1</sup>H NMR spectra of compound **3** in CDCl<sub>3</sub>.

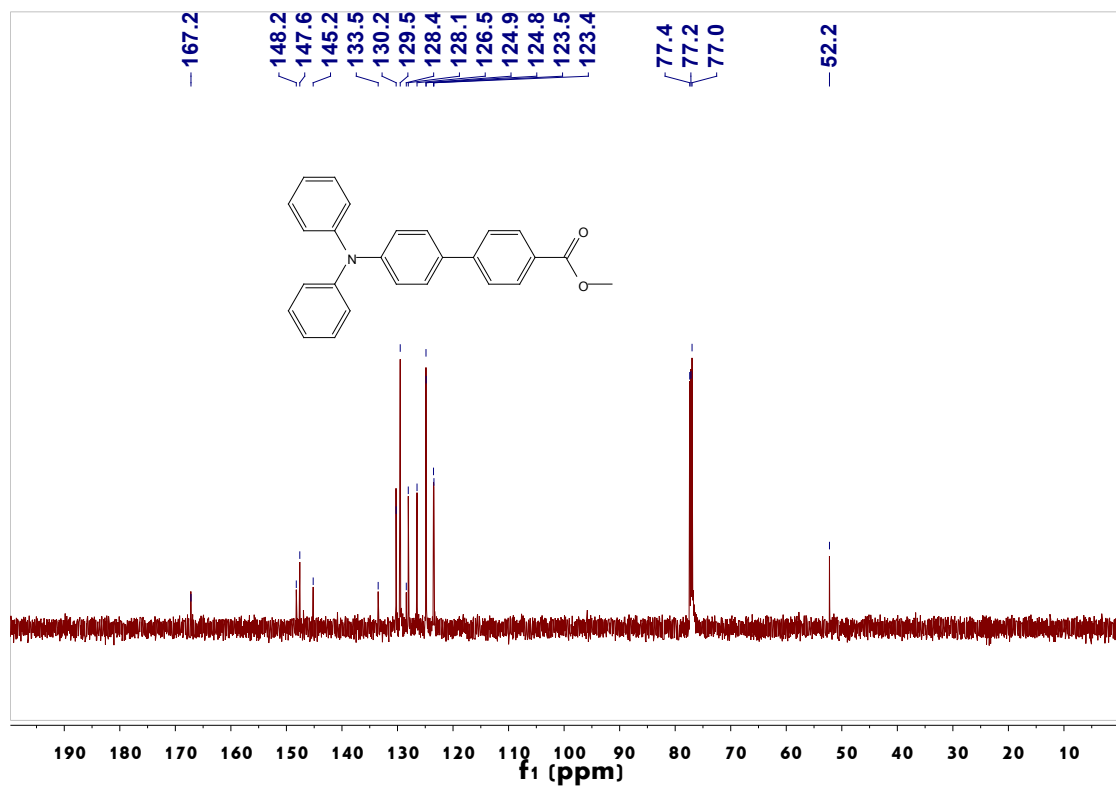

Fig. S2 <sup>13</sup>C NMR spectra of compound 3 in CDCl<sub>3</sub>.

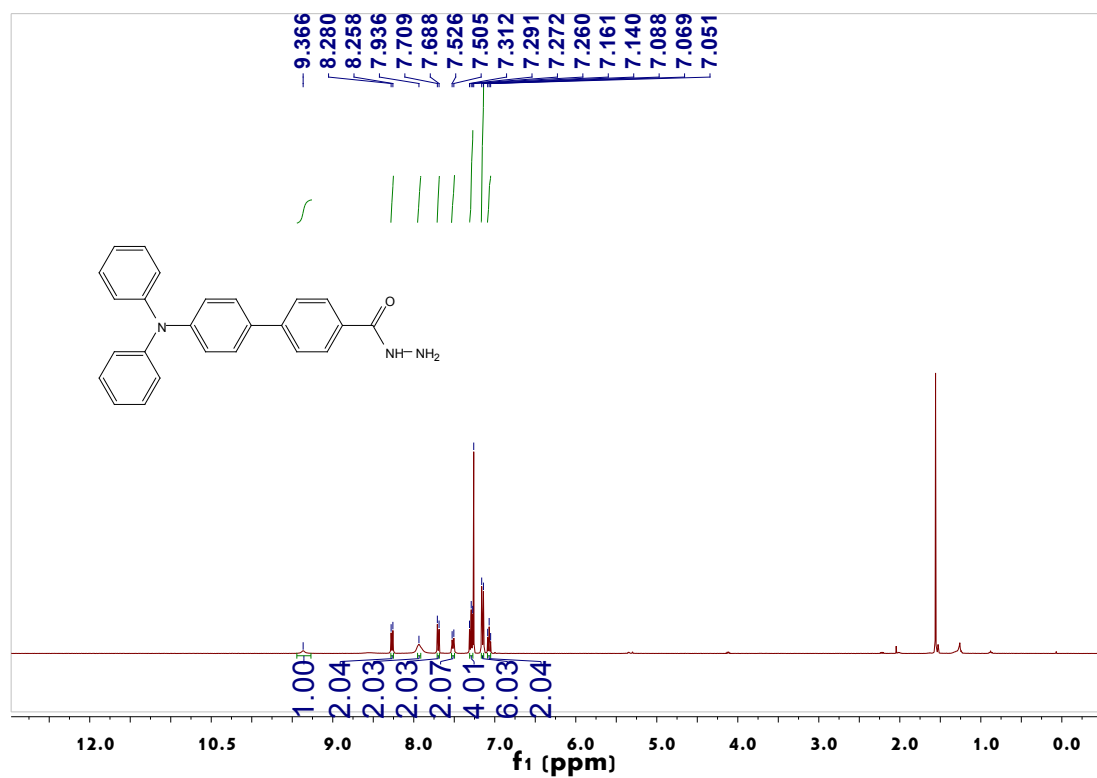

Fig. S3 <sup>1</sup>H NMR spectra of compound 4 in CDCl<sub>3</sub>.

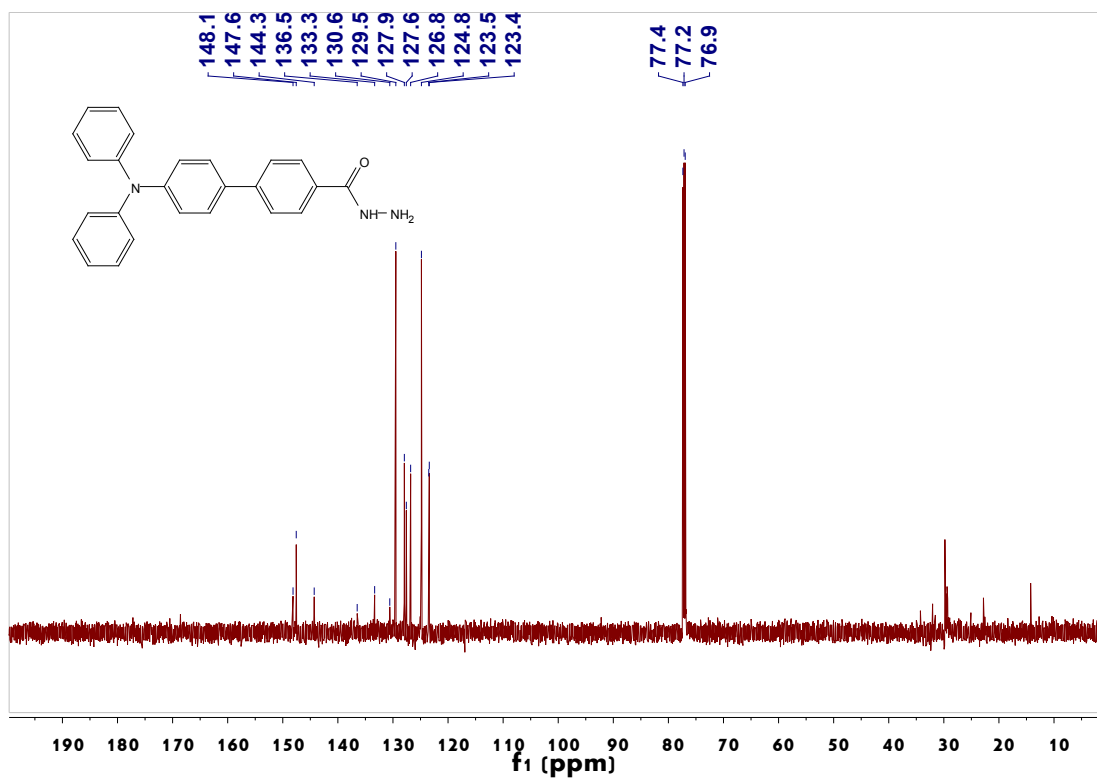

Fig. S4  $^{13}\text{C}$  NMR spectra of compound 4 in  $\text{CDCl}_3$ .

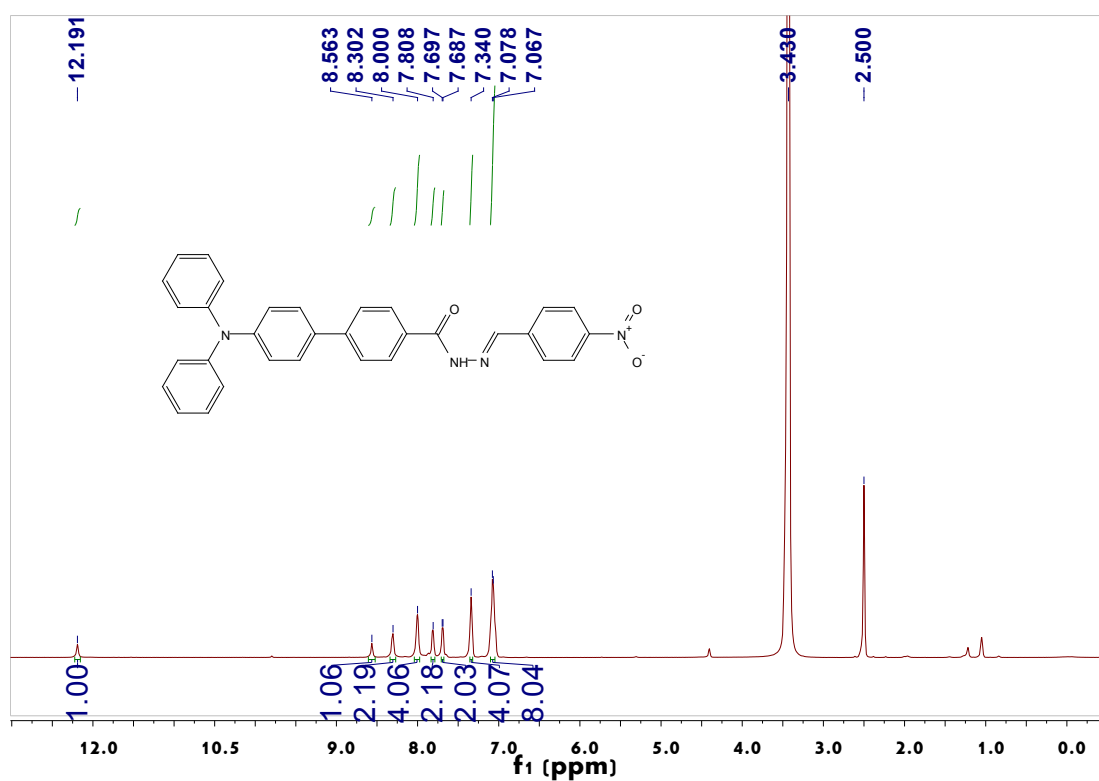

Fig. S5  $^1\text{H}$  NMR spectra of probe SHJ-1 in  $\text{DMSO-}d_6$ .

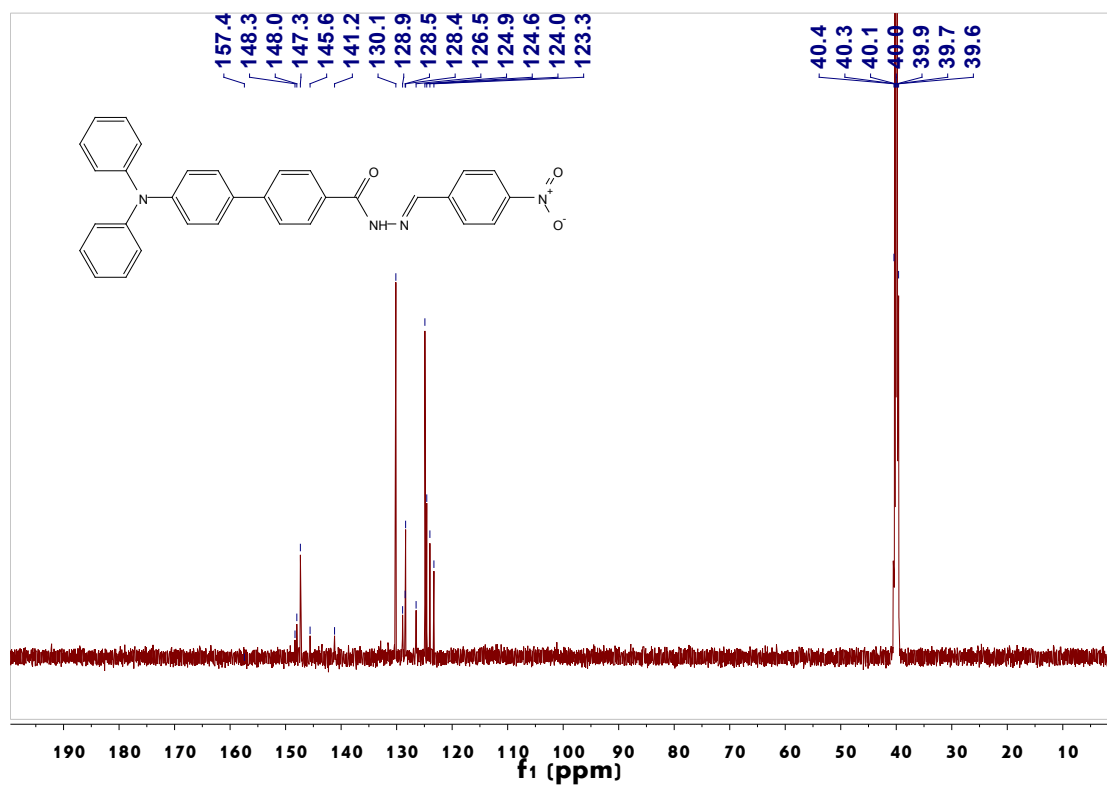

**Fig. S6** <sup>13</sup>C NMR spectra of probe SHJ-1 in DMSO-*d*<sub>6</sub>.

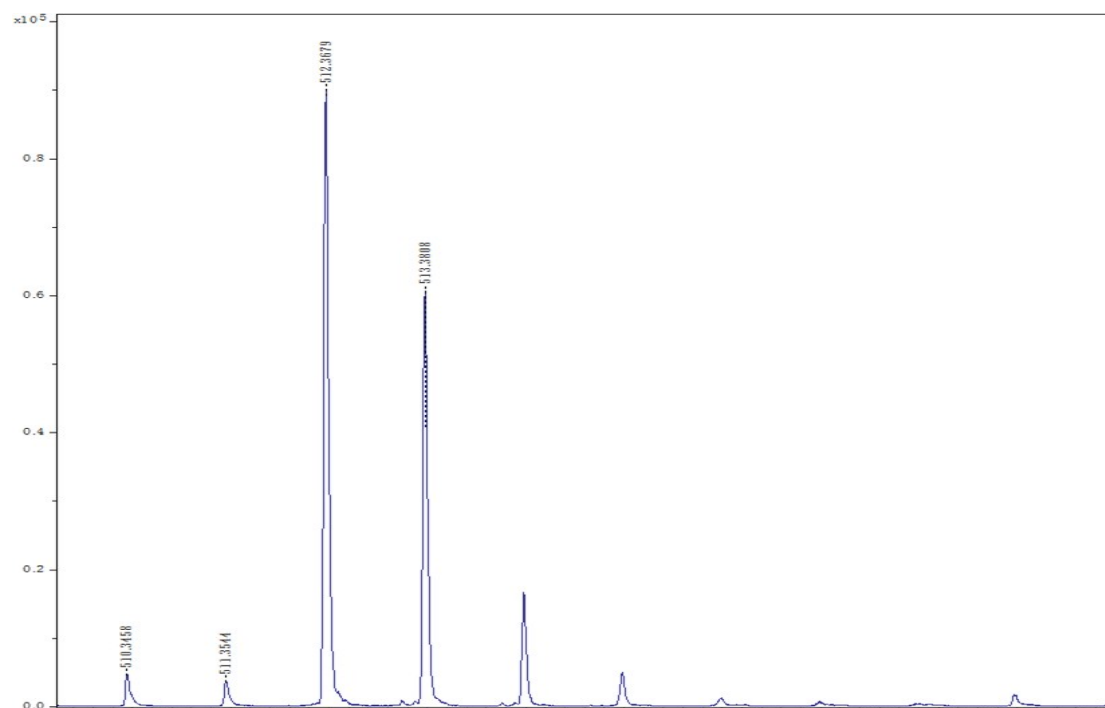

**Fig. S7** Mass spectra of probe SHJ-1.

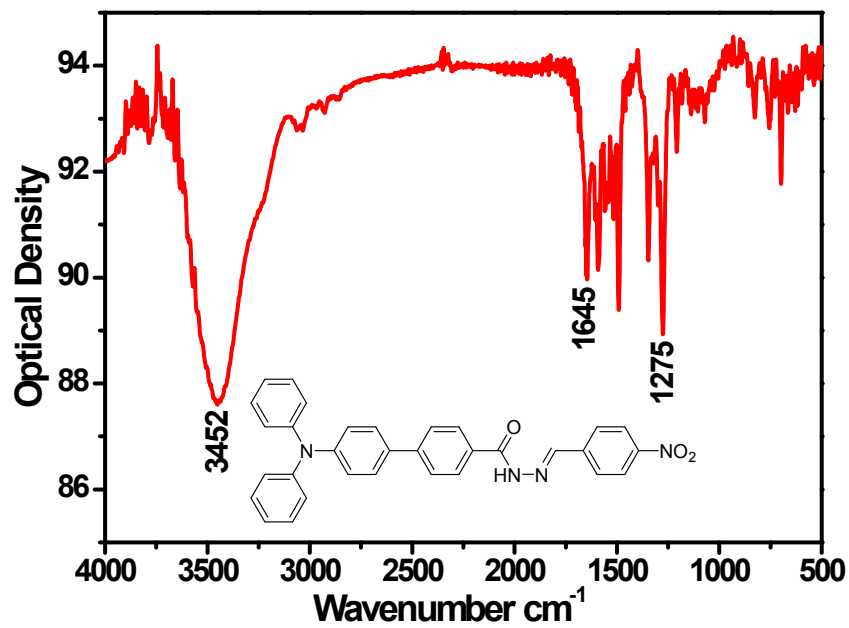

Fig. S8 FT-IR spectrum of probe SHJ-1.

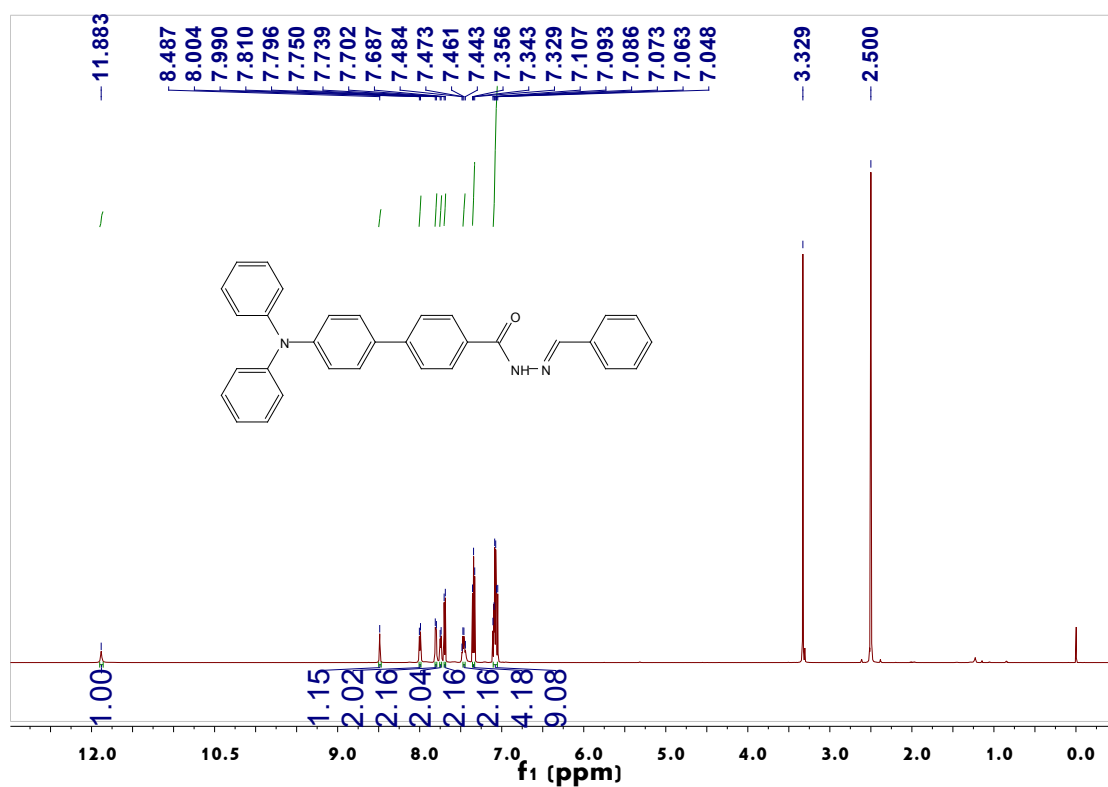

Fig. S9 <sup>1</sup>H NMR spectra of probe SHJ-2 in DMSO-*d*<sub>6</sub>.



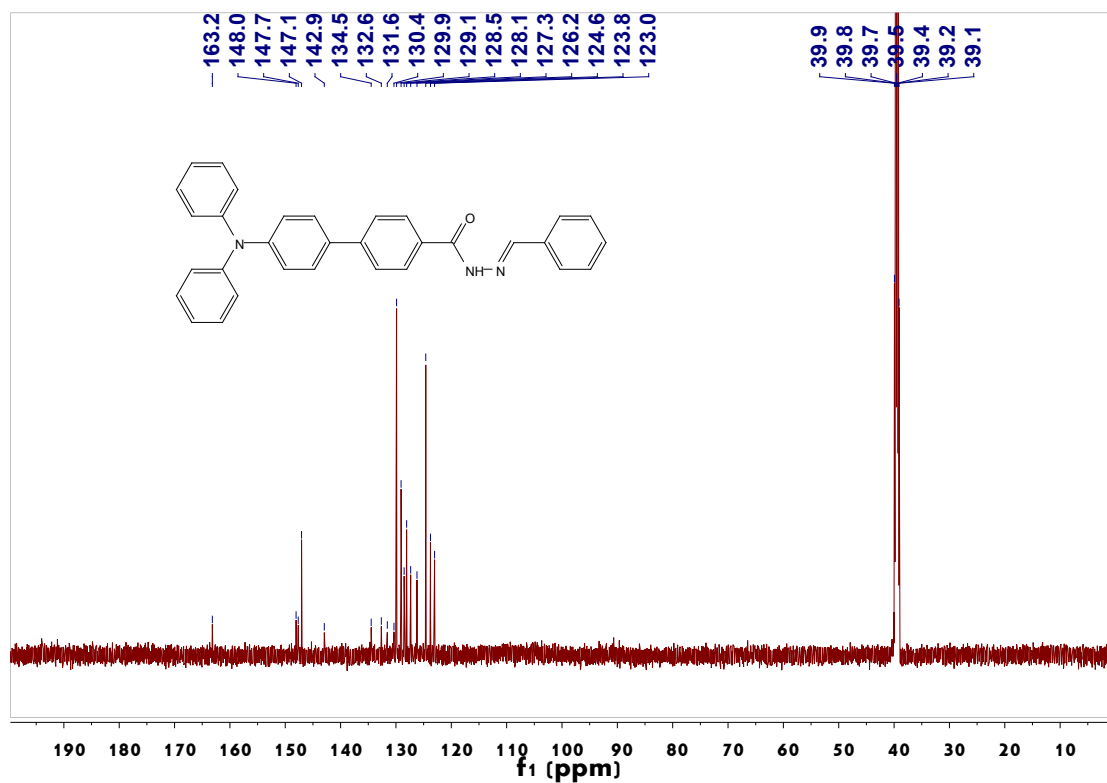

**Fig. S10** <sup>13</sup>C NMR spectra of probe SHJ-2 in DMSO-*d*<sub>6</sub>.

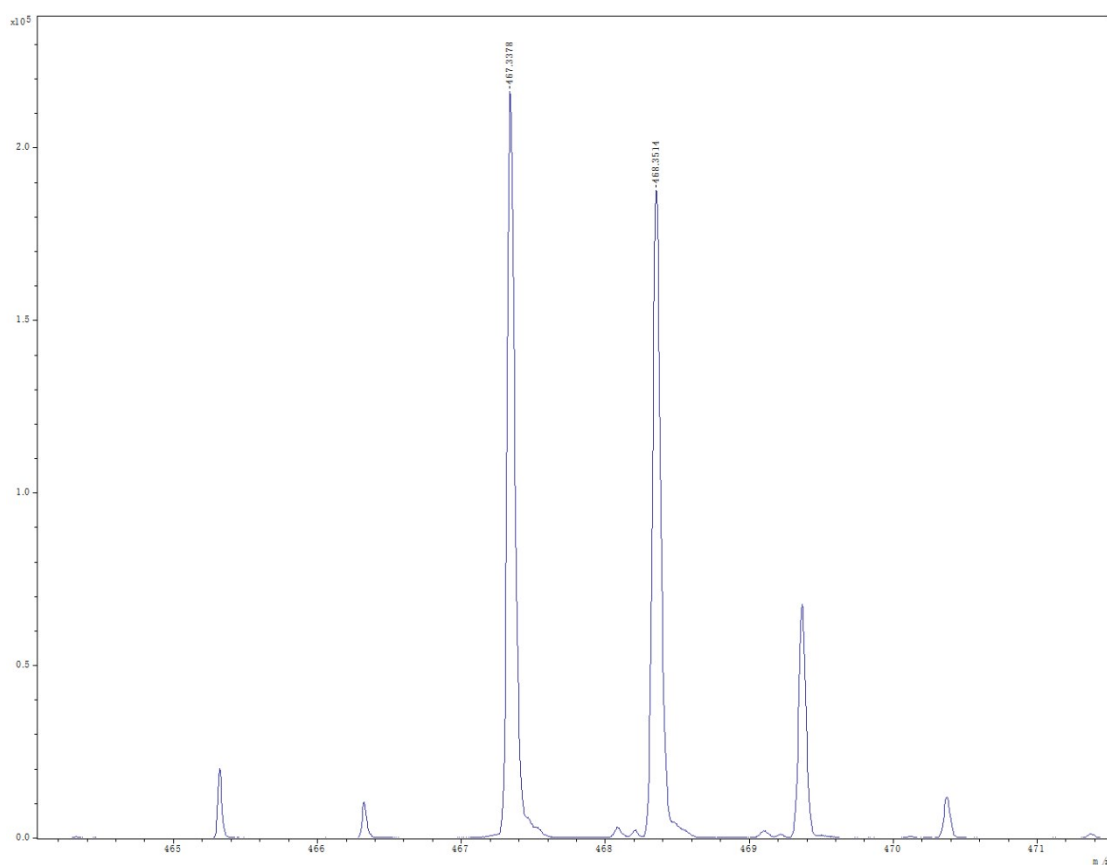

**Fig. S11** Mass spectra of probe SHJ-2.

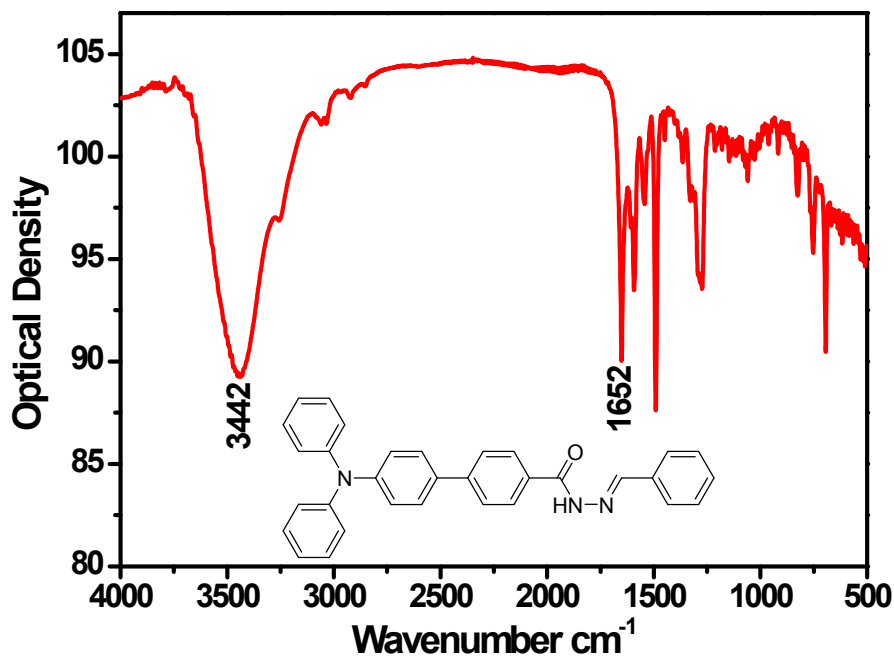

Fig. S12 FT-IR spectrum of probe SHJ-2.

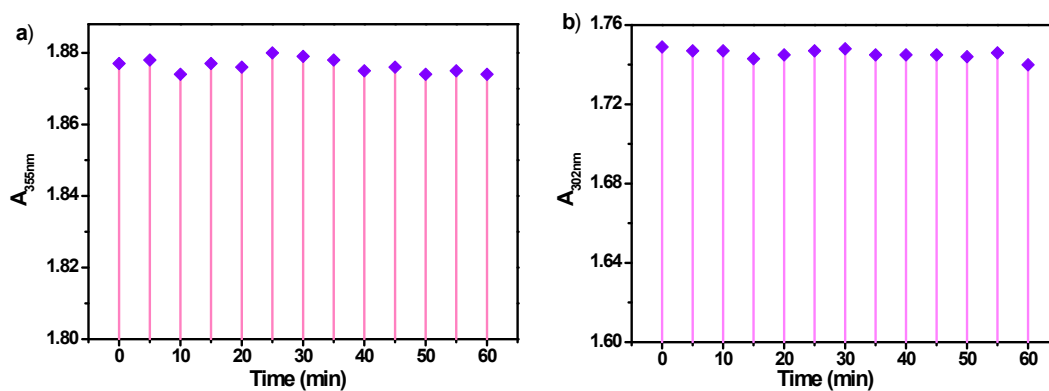

Fig. S13 The stability of a) SHJ-1 and b) SHJ-2 in DMSO.

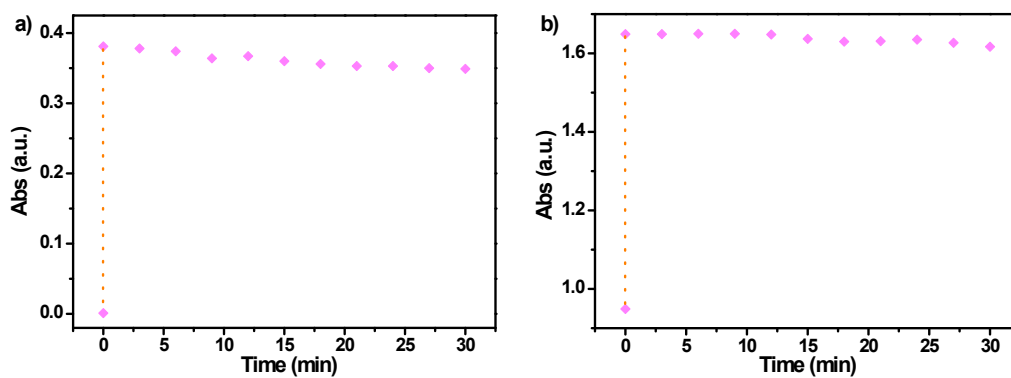

Fig. S14. The response time of a) SHJ-1 and b) SHJ-2 to  $\text{F}^-$  in DMSO solution.

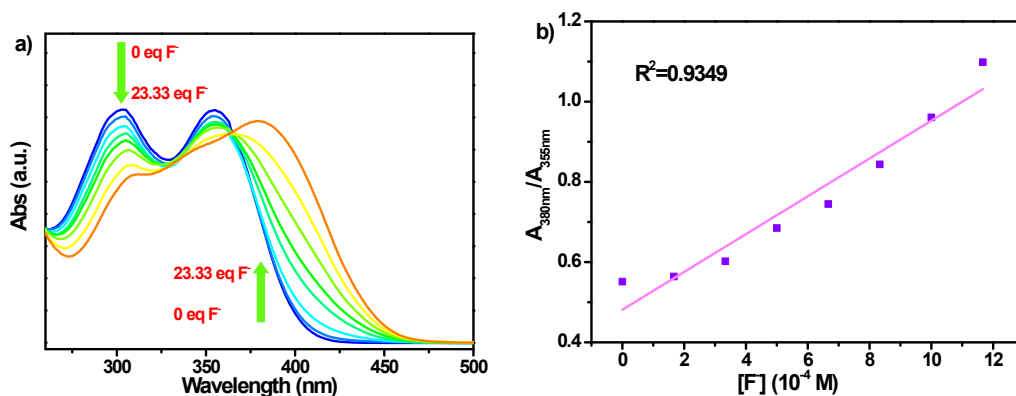

**Fig. S15.** a) Absorption spectra of probe **SHJ-2** in DMSO with the addition of different equiv. of TBAF; b) The absorbance ratio ( $A_{302\text{nm}}/A_{380\text{nm}}$ ) of **SHJ-2** versus  $F^-$  concentrations.

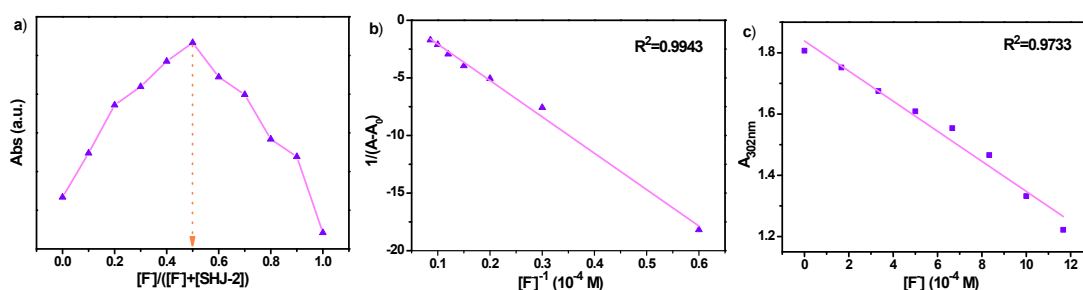

**Fig. S16.** a) Job's plot for complexation of **SHJ-2** with  $F^-$  anion. b) Benesi - Hildebrand plot of **SHJ-2** by UV-vis measurements. c) Absorbance of **SHJ-2** in the presence of TBAF at different concentration in DMSO.

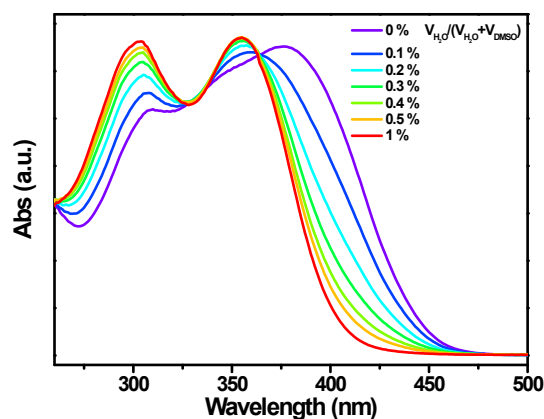

**Fig. S17.** Absorbance spectra of **SHJ-2** in the presence of 23.33 equivalents of TBAF in DMSO with various content of water.

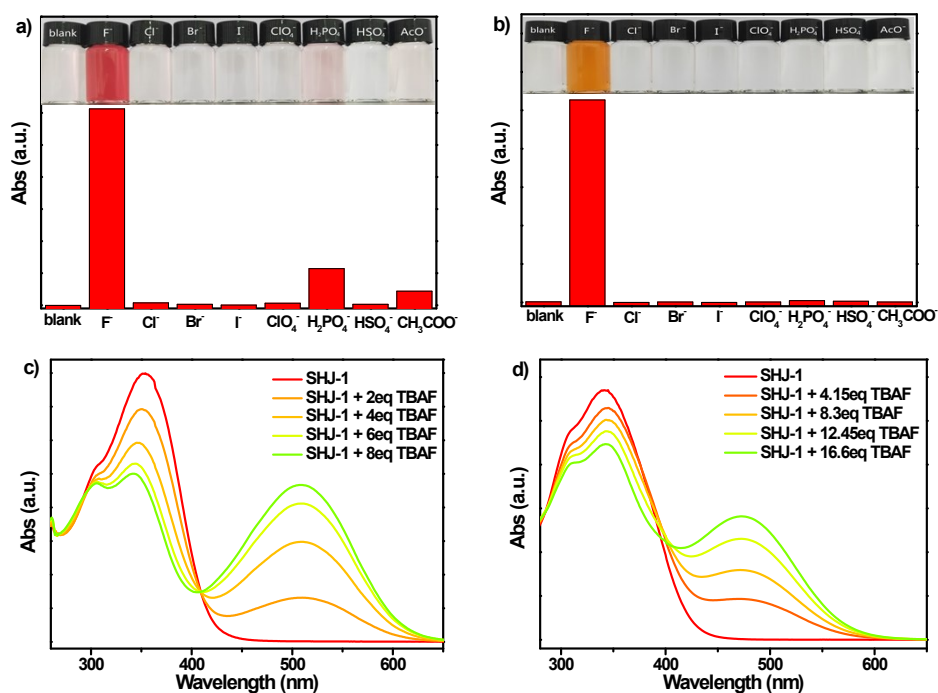

**Fig. S18.** The intensity of the maximum visible absorption peak of probes **SHJ-1** with the addition of 8 equiv. of various anions (as tetrabutylammonium salt) in a) DMF and b) DCM solution at room temperature. (Inset: Color changes of **SHJ-1** with the addition of 8 equiv. of various anions under ambient light). Absorption spectra of probe **SHJ-1** in c) DMF and d) DCM with the addition of different equiv. of TBAF;

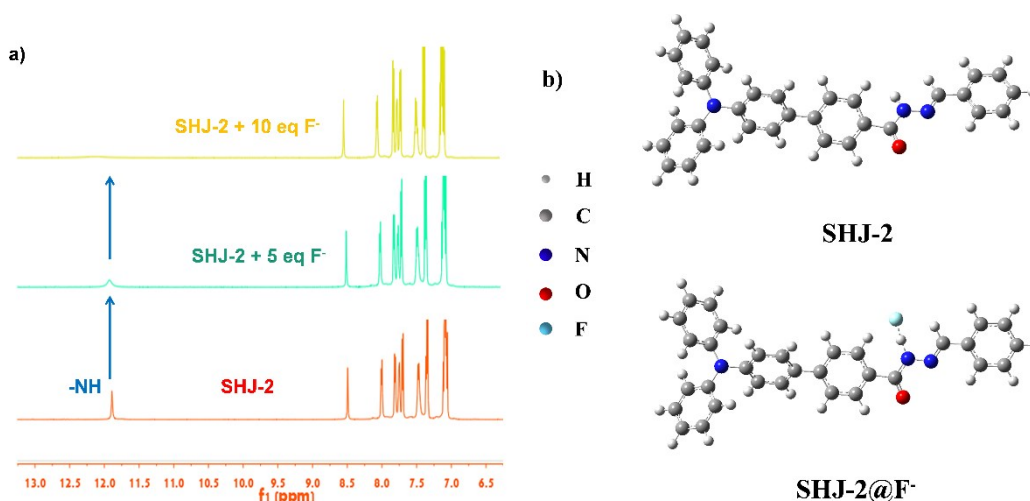

**Fig. S19.** a) <sup>1</sup>H NMR titration spectra of the probe **SHJ-2** in DMSO-*d*<sub>6</sub> in presence of different equivalents of TBAF; b) Optimized structures of **SHJ-2** and **SHJ-2 + F<sup>-</sup>**.

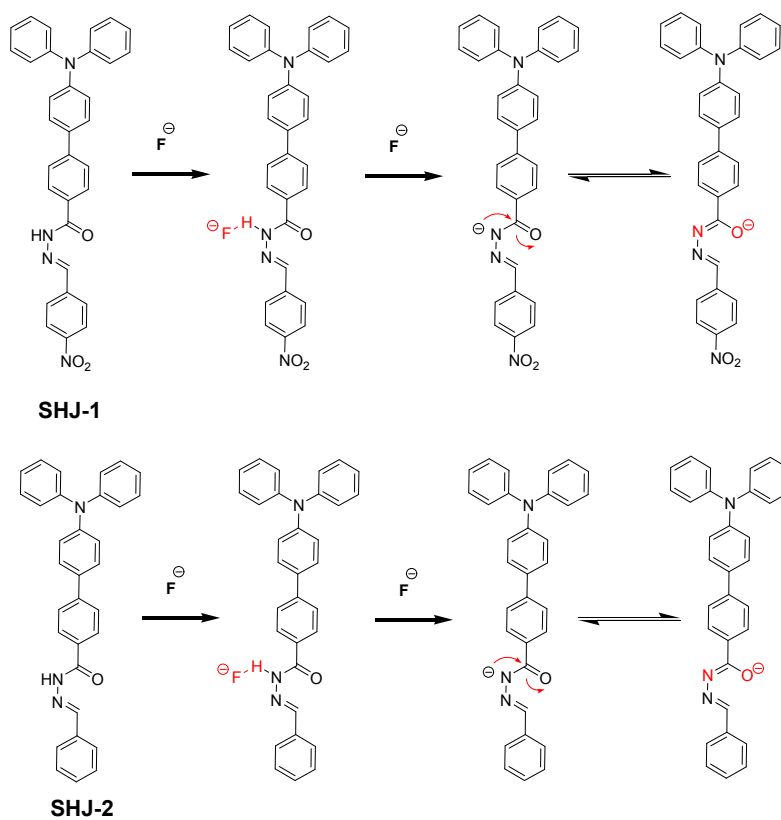

**Fig. S20.** A schematic of probable complex formation reaction during the fluoride sensing process

**Table S1.** Properties of **SHJ-1** and the reported acylhydrazone-based fluoride ion probes.

| sample | $\lambda_{\max}$ (nm)<br>without F <sup>-</sup> | $\lambda_{\max}$ (nm)<br>with F <sup>-</sup> | $\Delta\lambda$<br>(nm) | solvent               | Interference ions | <sup>a</sup> LOD ( $\mu\text{M}$ ) | reference |
|--------|-------------------------------------------------|----------------------------------------------|-------------------------|-----------------------|-------------------|------------------------------------|-----------|
| 1      | 370                                             | 480                                          | 110                     | THF                   | none              | 0.91                               | [41]      |
| 2      | 400                                             | 475                                          | 75                      | THF                   | none              | -                                  | [45]      |
| 3      | 404                                             | 515                                          | 111                     | DMSO/H <sub>2</sub> O | none              | 0.55                               | [44]      |
| 4      | 293                                             | 377                                          | 84                      | CH <sub>3</sub> CN    | none              | -                                  | [42]      |
| 5      | 438                                             | 532                                          | 94                      | DMSO                  | none              | 0.83                               | [40]      |
| 6      | 355                                             | 500                                          | 145                     | DMSO                  | none              | 1.24                               | This work |

a) The limit of detection.

## Reference

1. Frisch, M. J.; Trucks, G. W.; Schlegel, H. B.; Scuseria, G. E.; Robb, M. A.; Cheeseman, J. R.; Scalmani, G.; Barone, V.; Mennucci, B.; Petersson, G. A.; Nakatsuji, H.; Caricato, M.; Li, X.; Hratchian, H. P.; Izmaylov, A. F.; Bloino, J.; Zheng, G.; Sonnenberg, J. L.; Hada, M.; Ehara, M.; Toyota, K.; Fukuda, R.; Hasegawa, J.; Ishida, M.; Nakajima, T.; Honda, Y.; Kitao, O.; Nakai, H.; Vreven, T.; Jr. Montgomery, J. A.; Peralta, J. E.; Ogliaro, F.; Bearpark, M.; Heyd, J. J.; Brothers, E.; Kudin, K. N.; Staroverov, V. N.; Kobayashi, R.; Normand, J.; Raghavachari, K.; Rendell, A.; Burant, J. C.; Iyengar, S. S.; Tomasi, J.; Cossi, M.; Rega, N.; Millam, J. M.; Klene, M.; Knox, J. E.; Cross, J. B.; Bakkem, V.; Adamo, C.; Jaramillo, J.; Gomperts, R.; Stratmann, R. E.; Yazyev, O.; Austin, A. J.; Cammi, R.; Pomelli, C.; Ochterski, J. W.; Martin, R. L.; Morokuma, K.; Farkas, O.; Foresman, J. B.; Fox, D. J. *Gaussian 16, Rev. A.03*; Gaussian, Inc.: Wallingford, CT, **2016**.
